# Supplementary material
Source: PubMed Central journal article supplement (PMC3808250)
Supplement: NIHMS519072-supplement-1.pdf [file NIHMS519072-supplement-1.pdf]

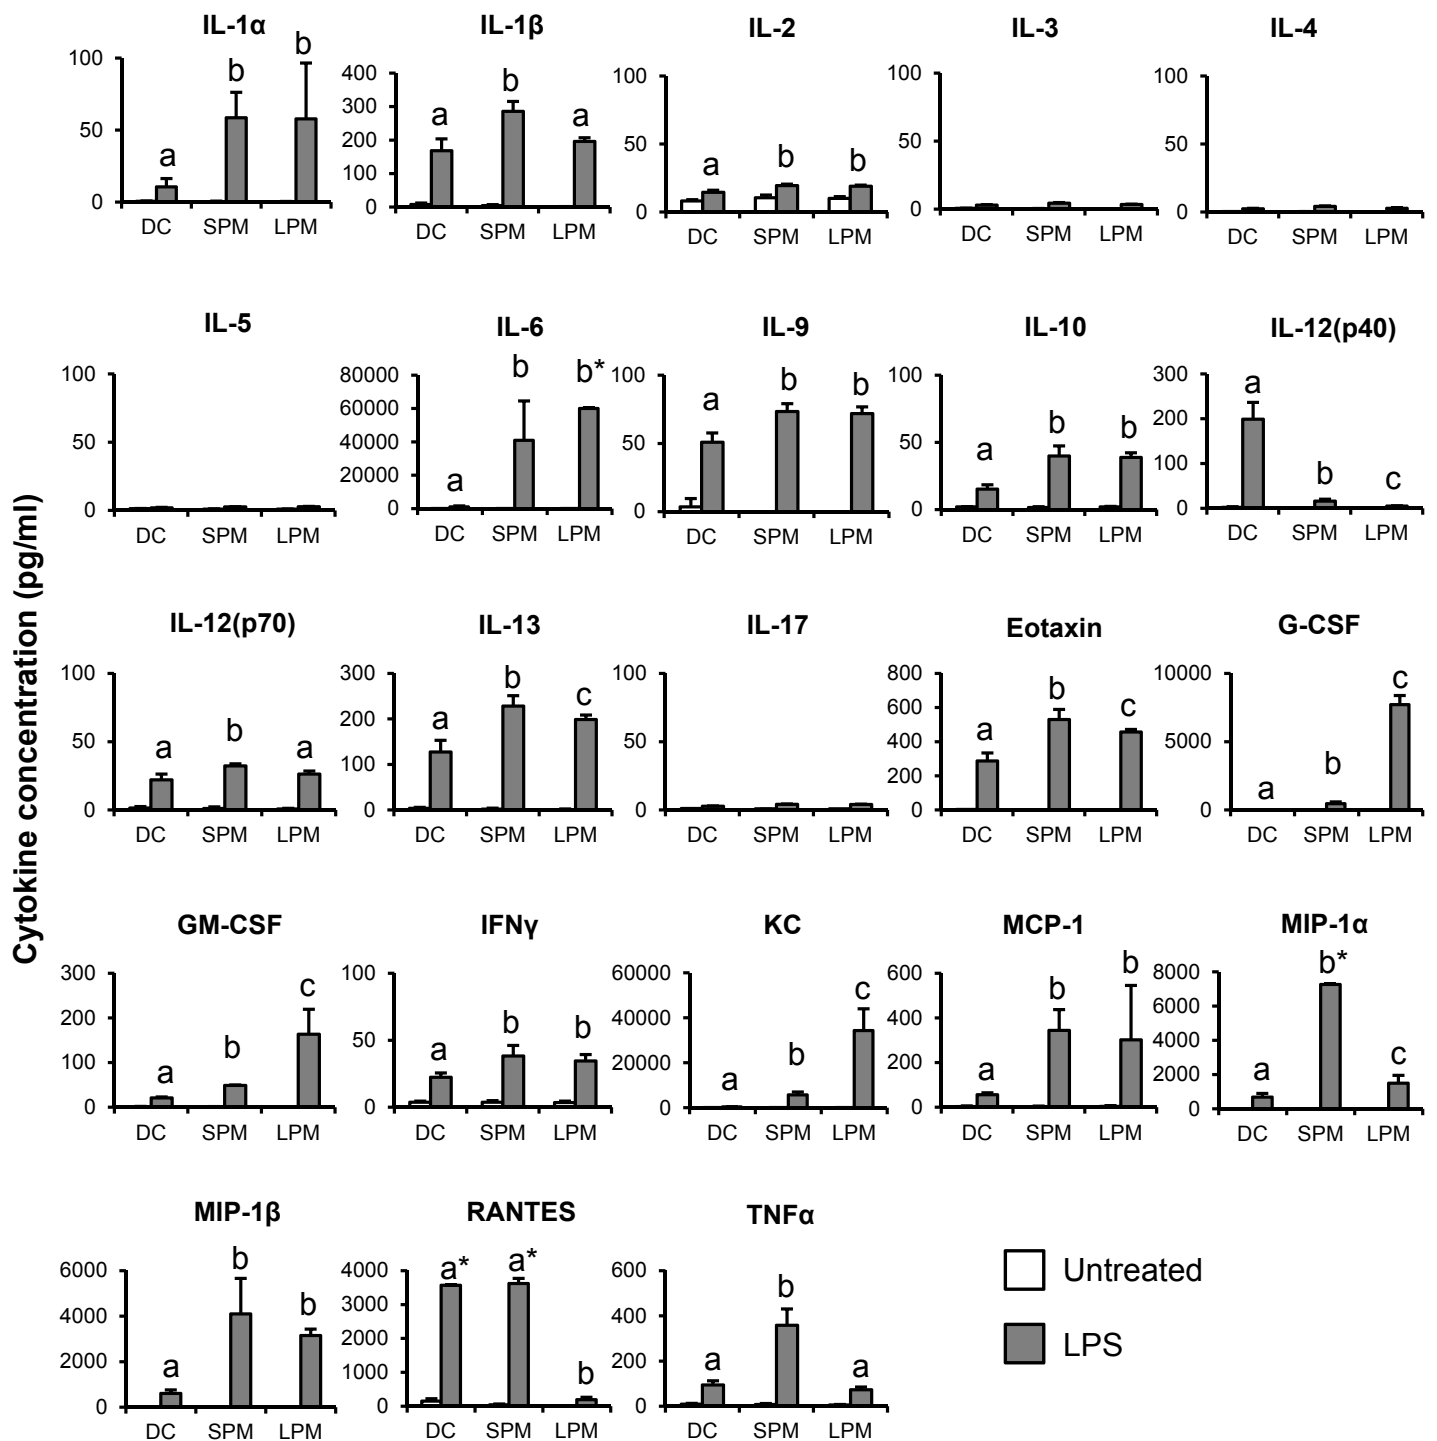

**Supplemental Figure 1: Cytokine profiles of SPM, LPM, and DC following *in vitro* exposure to LPS.** SPM, LPM, and DC were sorted from peritoneal lavages of C57BL/6 mice and then stimulated overnight with LPS. Supernatants were analyzed for cytokines using a multiplex cytokine array. The mean+SD concentration of each cytokine is shown (n=3-7 per cohort). Statistical significance between LPS-treated cohorts is designated by letters above each bar; cohorts exhibiting significant differences (P<0.05) bear different letter designations. In cohorts labeled with an asterisk, some or all of the samples gave readings that exceeded the range of the standard curve; for these samples, the maximum value of the standard curve was used.

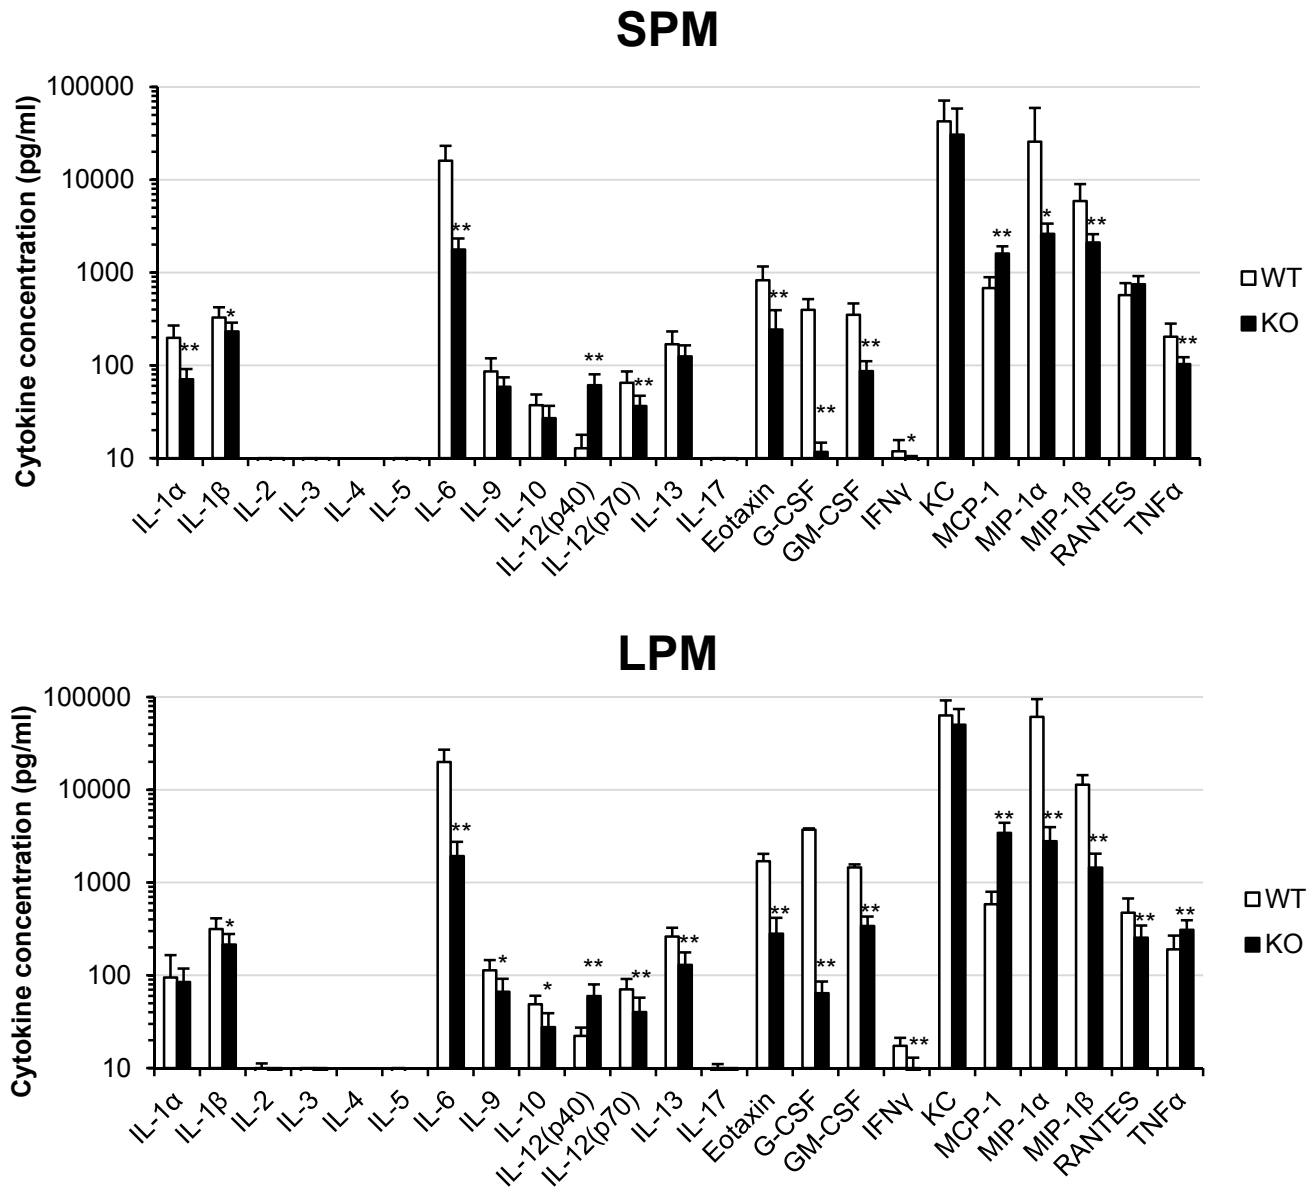

**Supplemental Figure 2: Cytokine profiles of peritoneal macrophages of *C/EBPβ*<sup>+/+</sup> and *C/EBPβ*<sup>-/-</sup> mice following *in vitro* treatment with LPS.** IgM<sup>-</sup>CD11c<sup>+</sup>CD11b<sup>hi</sup>SSC<sup>hi</sup>MHCII<sup>hi</sup> cells (“SPM”) and IgM<sup>-</sup>CD11c<sup>+</sup>CD11b<sup>hi</sup>SSC<sup>hi</sup>MHCII<sup>low</sup> cells (“LPM”) were sorted from peritoneal lavages of *C/EBPβ*<sup>+/+</sup> (open bars) and *C/EBPβ*<sup>-/-</sup> (closed bars) mice and then stimulated overnight with LPS. Supernatants were analyzed for cytokines using a multiplex cytokine array. The mean ± SD concentration of each cytokine is shown (n=4 per cohort). \* P≤0.05, \*\* P≤0.01.

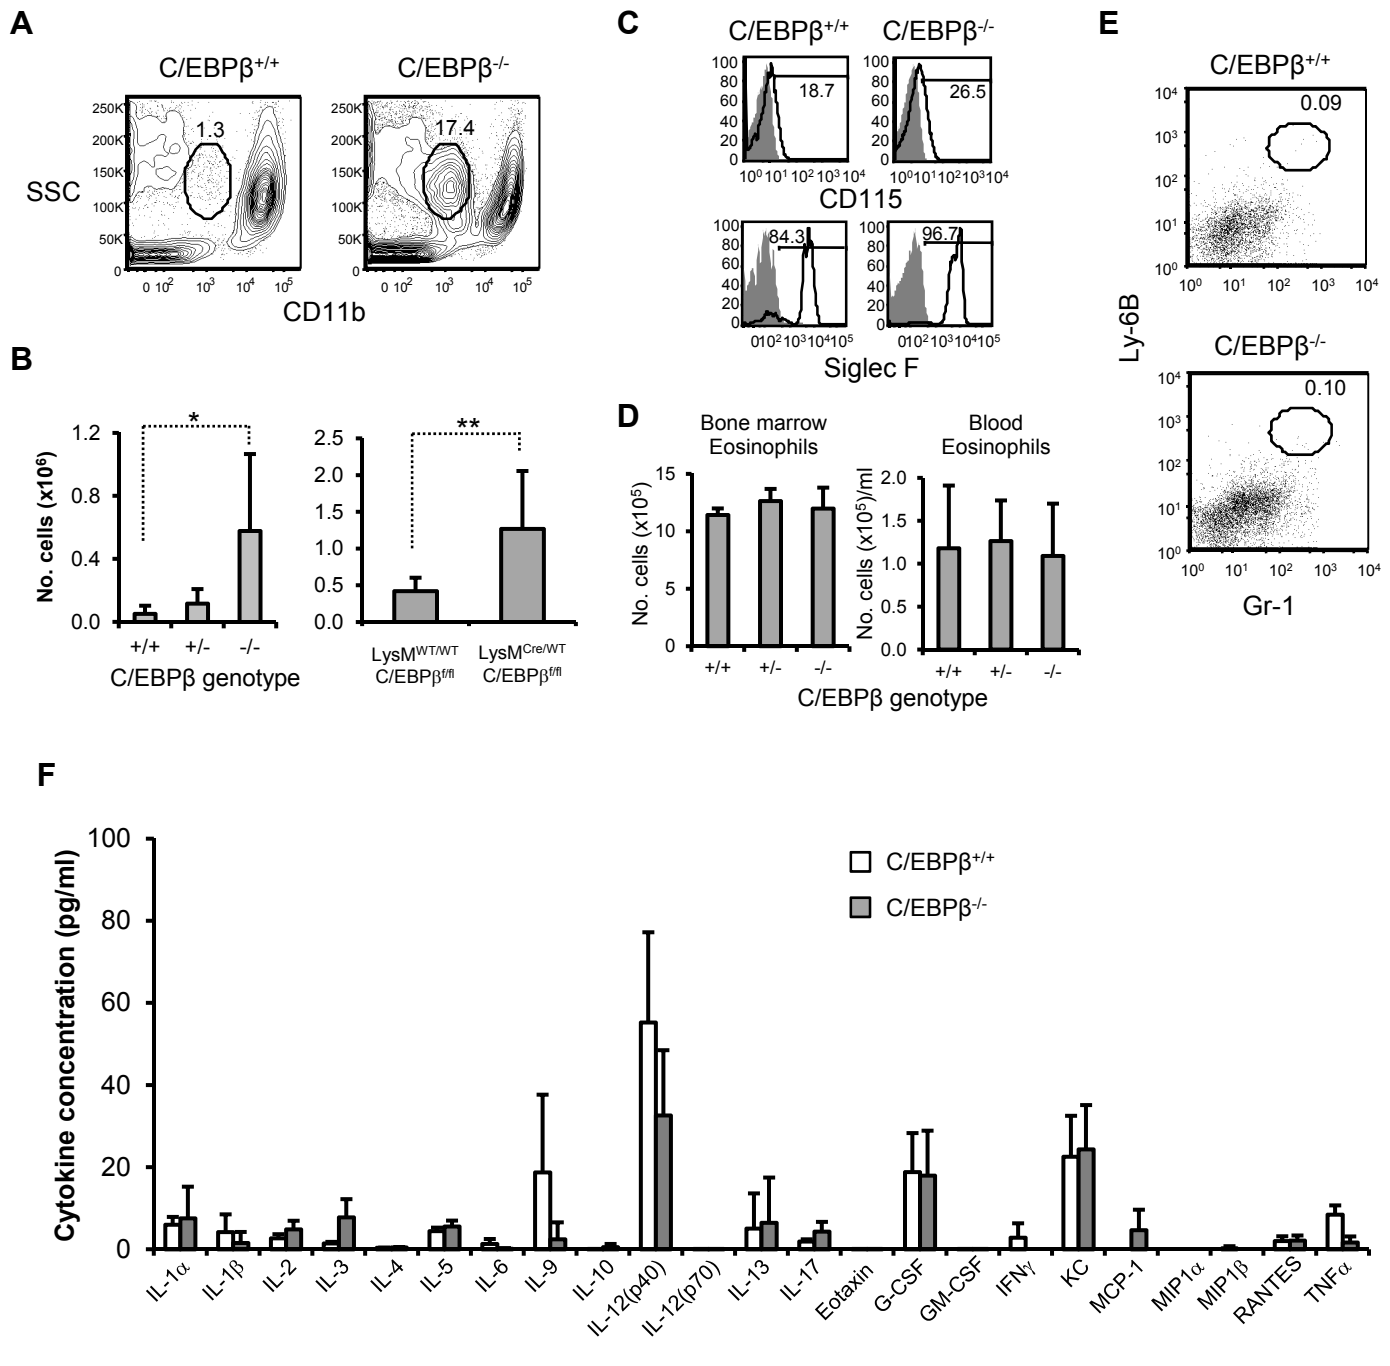

**Supplemental Figure 3. Peritoneal eosinophilia but minimal inflammation in naïve C/EBP $\beta^{-/-}$  mice.** (A) Representative CD11b/SSC plots of IgM<sup>-</sup>CD11b<sup>int</sup>SSC<sup>hi</sup> cells in C/EBP $\beta^{+/+}$  and C/EBP $\beta^{-/-}$  mice. (B) The mean ( $\pm$ SD) numbers of IgM<sup>-</sup>CD11b<sup>int</sup>SSC<sup>hi</sup> cells in C/EBP $\beta^{+/+}$ , C/EBP $\beta^{+/-}$ , and C/EBP $\beta^{-/-}$  mice (left panel) and in LysM<sup>WT/WT</sup>/C/EBP $\beta^{fl/fl}$  and LysM<sup>Cre/WT</sup>/C/EBP $\beta^{fl/fl}$  mice (right panel). \*  $P \leq 0.05$ , \*\*  $P \leq 0.01$ . (C) Isotype control (gray histograms) vs. CD115 and Siglec F staining (open histograms) of IgM<sup>-</sup>CD11b<sup>int</sup>SSC<sup>hi</sup> cells in C/EBP $\beta^{+/+}$  and C/EBP $\beta^{-/-}$  mice. (D) Mean ( $\pm$ SD) numbers of Ly6<sup>-</sup>CD11b<sup>+</sup>SSC<sup>hi</sup> eosinophils in the bone marrow (2 femurs+2 tibiae) and blood of C/EBP $\beta^{+/+}$ , C/EBP $\beta^{+/-}$ , and C/EBP $\beta^{-/-}$  mice.  $n \geq 4$  mice per genotype. (E) C/EBP $\beta^{+/+}$  and C/EBP $\beta^{-/-}$  mice were analyzed for peritoneal neutrophils and inflammatory monocytes (Gr-1<sup>+</sup>Ly-6B<sup>+</sup> cells) by FACS. Data are representative of 4 independent experiments,  $n=3-7$  mice. (F) The mean ( $\pm$ SD) concentrations of 23 cytokines in the sera of C/EBP $\beta^{+/+}$  and C/EBP $\beta^{-/-}$  mice are shown. Data represent one experiment,  $n=3$  mice per genotype.

## A Spleen

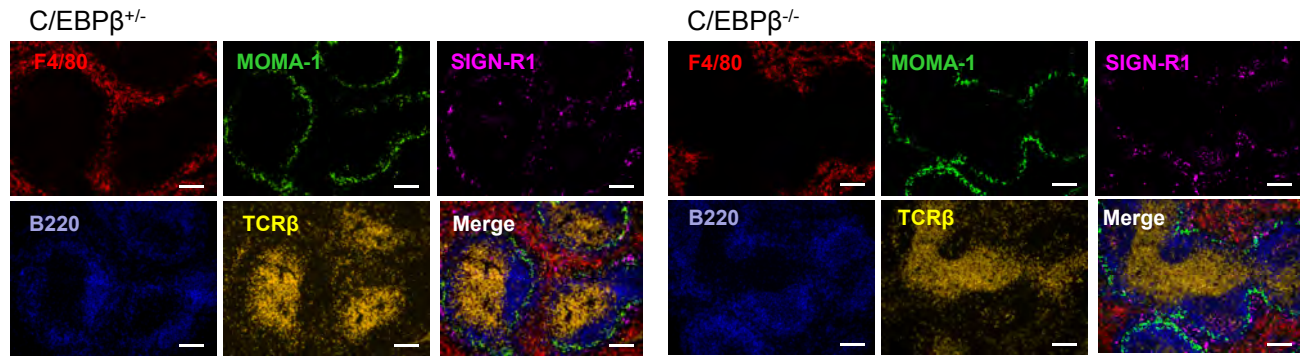

## B

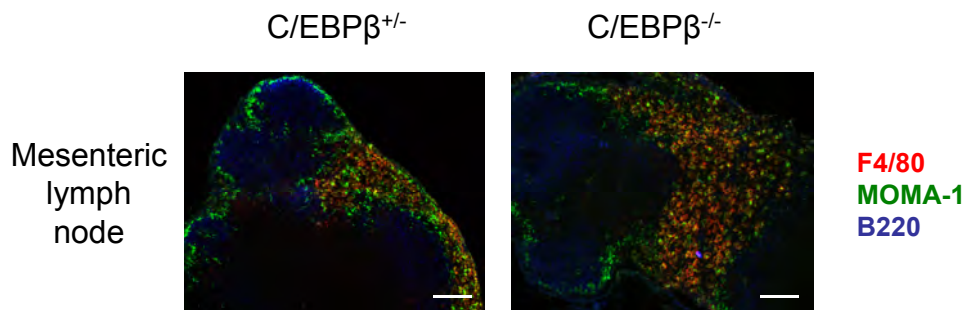

**Supplemental Figure 4. Histological analysis of macrophage compartments in the spleen and mesenteric lymph nodes of C/EBPβ<sup>-/-</sup> mice.** (A) Spleen sections from C/EBPβ-sufficient and deficient mice were stained for F4/80 (red), MOMA-1 (green), SIGN-R1 (pink), B220 (blue), and TCRβ (yellow). (B) Sections of mesenteric lymph nodes from C/EBPβ-sufficient and deficient mice were stained for F4/80 (red), MOMA-1 (green), and B220 (blue). Scale bar = 100 μm.
